# Supplementary material for: Metabolomic and transcriptomic analyses jointly reveal the mechanism underlying the reddening of Chimonanthus praecox stamens
Source: Front Plant Sci. 2024 Nov 20;15:1491246. doi: 10.3389/fpls.2024.1491246 (PMC11618622; doi:10.3389/fpls.2024.1491246)
Supplement: Supplementary file 6 [file Table3.xlsx]

## Sheet: Sheet1
Table S3. Differential metabolites in CP-PR vs CP-N
Compounds	Class	CP-PR1	CP-PR2	CP-PR3	CP-N1	CP-N2	CP-N3
Cyanidin-3-O-(6''-O-coumaryl)xyloside	Cyanidin	0.0439342	0.0707944	0.0532594	0.0124814	0.00676876	0.0104758
Cyanidin-3-gentiobioside	Cyanidin	0.265469	0.223017	0.218648	0	0	0
Cyanidin-malonyl-xylosyl-diglucoside	Cyanidin	0.0100921	0.00737056	0.00555827	0	0	0
Cyanidin-3-O-xyloside	Cyanidin	0.0935167	0.0657276	0.0817147	0	0	0
Cyanidin-3-pentoside	Cyanidin	0	0	0	0.0173145	0.0257542	0.0337143
Cyanidin-3-O-sophoroside	Cyanidin	0	0	0	0.0340531	0.0544626	0.0658223
Cyanidin-3-O-sambubioside	Cyanidin	0.470295	0.469707	0.410337	0.0256456	0.0254178	0.0286726
Cyanidin-3-O-rutinoside	Cyanidin	355.718	357.641	326.093	15.9585	14.6646	16.7259
Cyanidin-3-O-(6-O-malonyl-beta-D-glucoside)	Cyanidin	0.079972	0.0811466	0.0866483	0	0	0
Cyanidin-3-O-glucoside	Cyanidin	504.398	506.353	475.11	13.0327	12.4397	12.843
Cyanidin-3-(6''-O-p-caffeoyl)-glucoside	Cyanidin	0.0269225	0.0193919	0.0273165	0	0	0
Cyanidin-3-O-arabinoside	Cyanidin	0	0	0	0.013976	0.0135964	0.0120339
Cyanidin-3,5-O-diglucoside	Cyanidin	0.197278	0.216646	0.188203	0	0	0
Cyanidin-3-O-galactoside	Cyanidin	0	0	0	0.568553	0.670182	0.569267
Cyanidin-3-O-arabinosidase-glucoside	Cyanidin	0	0	0	0.0246491	0.02056	0.0238022
Delphinidin-3-O-glucoside	Delphinidin	1.1471	1.10735	1.1413	1.27214	1.29236	1.41228
Delphinidin-3,5-O-diglucoside	Delphinidin	0.130956	0.115541	0.141207	0.102466	0.12039	0.121925
Delphinidin-3-(6''-O-coumaroyl)galactoside)	Delphinidin	0.886123	0.872672	0.85066	1.10359	0.981558	1.06081
Delphinidin-glucoside-feruloyl-xyloside	Delphinidin	1.02898	1.0869	0.853549	0.614712	0.759483	0.949947
Delphinidin-3-O-galactoside	Delphinidin	1.19213	1.12827	1.13724	1.37093	1.41746	1.3252
Malvidin-3-O-(6''-O-xylosyl)glucoside	Malvidin	0	0	0	0.028397	0.0176405	0.02223
Malvidin-3-O-xyloside	Malvidin	0.76631	0.811023	0.871632	0	0	0
Malvidin-3-O-glucoside	Malvidin	0.0380216	0.0440051	0.034174	0	0	0
Malvidin-3-O-galactoside	Malvidin	0.0373514	0.0405246	0.0391072	0.0395191	0.0341796	0.0324673
Pelargonidin-3-O-glucoside	Pelargonidin	0.149846	0.133126	0.150819	0.0535344	0.0612375	0.054936
Pelargonidin-3-O-galactoside	Pelargonidin	0.119954	0.139058	0.137371	0.119503	0.090005	0.106905
Pelargonidin-3-O-coumaroyl-5-O-galactoside	Pelargonidin	0	0	0	0.0596319	0.0711178	0.0572823
Pelargonidin-3-sophoroside-5-glucoside	Pelargonidin	0.00476845	0.00562529	0.00682243	0	0	0
Pelargonidin-3-O-rutinoside	Pelargonidin	0.285867	0.289881	0.277976	0.0606488	0.0523889	0.0560053
Peonidin	Peonidin	0	0	0	0.0632434	0.060743	0.0590803
Peonidin-3-O-glucoside	Peonidin	0.151126	0.127483	0.148387	0	0	0
Petunidin-3-O-(6''-O-caffeoyl)-rhamnoside	Petunidin	0.0116347	0.00872753	0.012268	0	0	0
Petunidin-3-O-(coumaroyl)rhamnoside-5-O-glucoside	Petunidin	0.00956687	0.00873248	0.0105562	0.0151363	0.0171245	0.0205605
Petunidin-3-O-rutinoside-5-O-rhamnoside	Petunidin	0.00858473	0.0103304	0.00925461	0.00947031	0.0163859	0.0183609
Petunidin-3-O-(6''-O-malonyl)-glucoside-5-O-glucoside	Petunidin	0.00601966	0.00674168	0.00364443	0.165544	0.147496	0.193134
Petunidin-3-O-(6''-O-malonyl)galactoside	Petunidin	0.0428638	0.0341883	0.0395181	0.335734	0.286193	0.30417
Petunidin-3-O-(6-O-malonyl-beta-D-glucoside)	Petunidin	0.0248795	0.0234177	0.0246569	0.131423	0.143491	0.123511
Petunidin-glucoside-galactoside	Petunidin	0.114274	0.113046	0.0809684	0.74845	0.833363	0.707347
Petunidin-3-O-sophoroside	Petunidin	0	0	0	0.0132082	0.0138274	0.0119763
Petunidin-3-O-(6''-O-rhamnosyl)-galactoside	Petunidin	0	0	0	0.0101087	0.00774287	0.0116963
Procyanidin B1	Procyanidin	1.18571	1.16043	0.884099	6.61881	6.59589	6.7096
Procyanidin C1	Procyanidin	0.268968	0.279556	0.301897	0.539347	0.473102	0.7236
Procyanidin B4	Procyanidin	2.3023	2.13133	2.2377	11.6803	10.4639	11.2275
Procyanidin B3	Procyanidin	1.11277	1.06824	1.01237	6.67956	5.75005	6.8933
Procyanidin B2	Procyanidin	3.68052	3.55631	3.77278	7.46938	6.62071	7.3814
Naringenin	flavonoid	0	0	0	0.0411756	0.0353867	0.035509
Quercetin-3-O-glucoside	flavonoid	38.9774	54.989	70.9507	38.4712	36.3259	38.4663
